# Supplementary material for: Comparing the Bbs10 complete knockout phenotype with a specific renal epithelial knockout one highlights the link between renal defects and systemic inactivation in mice
Source: PubMed Central journal article supplement (PMC4535764; doi:10.1186/s13630-015-0019-8), 2015-08-13
Supplement: 13630_2015_19_MOESM2_ESM.pdf [file 13630_2015_19_MOESM2_ESM.pdf]

# Schematic representation of the DNA construct for the Knock out allele

Wildtype Allele  
(WT)

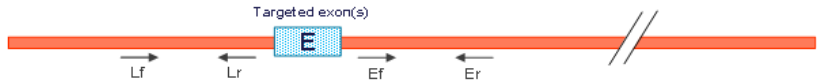

Targeted Allele  
(L3)

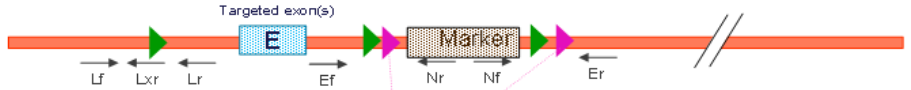

Conditional Allele  
(*In vivo* FLP  
Deletion)  
(L2)

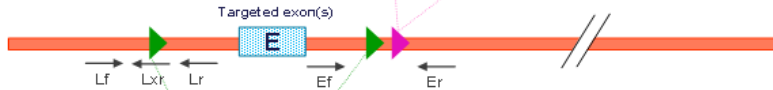

Knock-out Allele  
Conditional after inducible  
Cre Deletion  
Constitutive after *in vivo*  
Cre Deletion

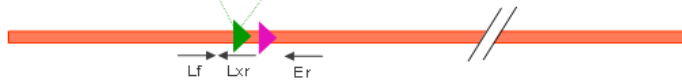

 **FRT**  
 **LoxP**  
 **primer**
