# Supplementary material for: Comparing the Bbs10 complete knockout phenotype with a specific renal epithelial knockout one highlights the link between renal defects and systemic inactivation in mice
Source: PubMed Central journal article supplement (PMC4535764; doi:10.1186/s13630-015-0019-8), 2015-08-13

# Apoptosis of photoreceptors in *Bbs10* total KO

A

TUNEL

18-day-old mice

TUNEL, DAPI

*Bbs10*<sup>+/+</sup>

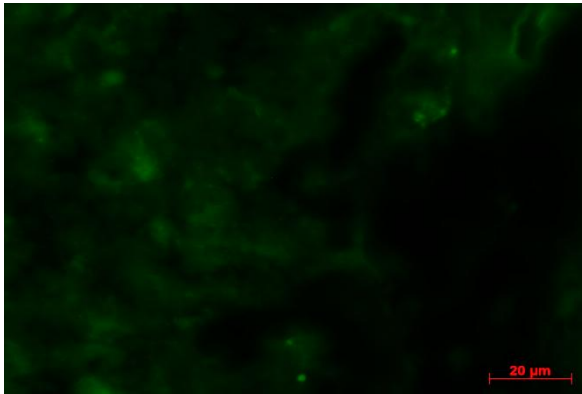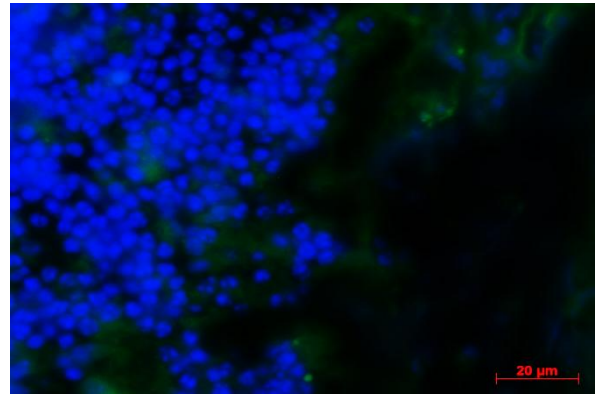

B

*Bbs10*<sup>-/-</sup>

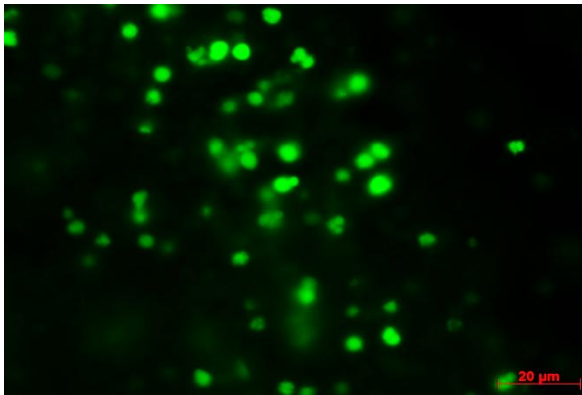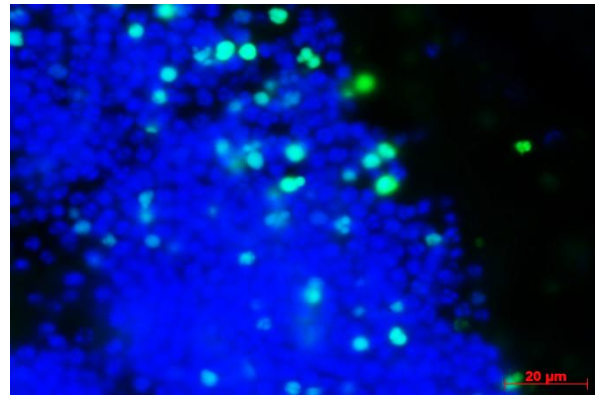

Supplement: 13630_2015_19_MOESM4_ESM.pdf [file 13630_2015_19_MOESM4_ESM.pdf]
