# Supplementary material for: Comparing the Bbs10 complete knockout phenotype with a specific renal epithelial knockout one highlights the link between renal defects and systemic inactivation in mice
Source: PubMed Central journal article supplement (PMC4535764; doi:10.1186/s13630-015-0019-8), 2015-08-13

# Transmission Electron Microscopy of kidney tubular cells

*Bbs10*<sup>+/+</sup>

*Bbs10*<sup>-/-</sup>

*Bbs10*<sup>fl/fl</sup>; *Cadh16*<sup>Cre<sup>+/+</sup></sup>

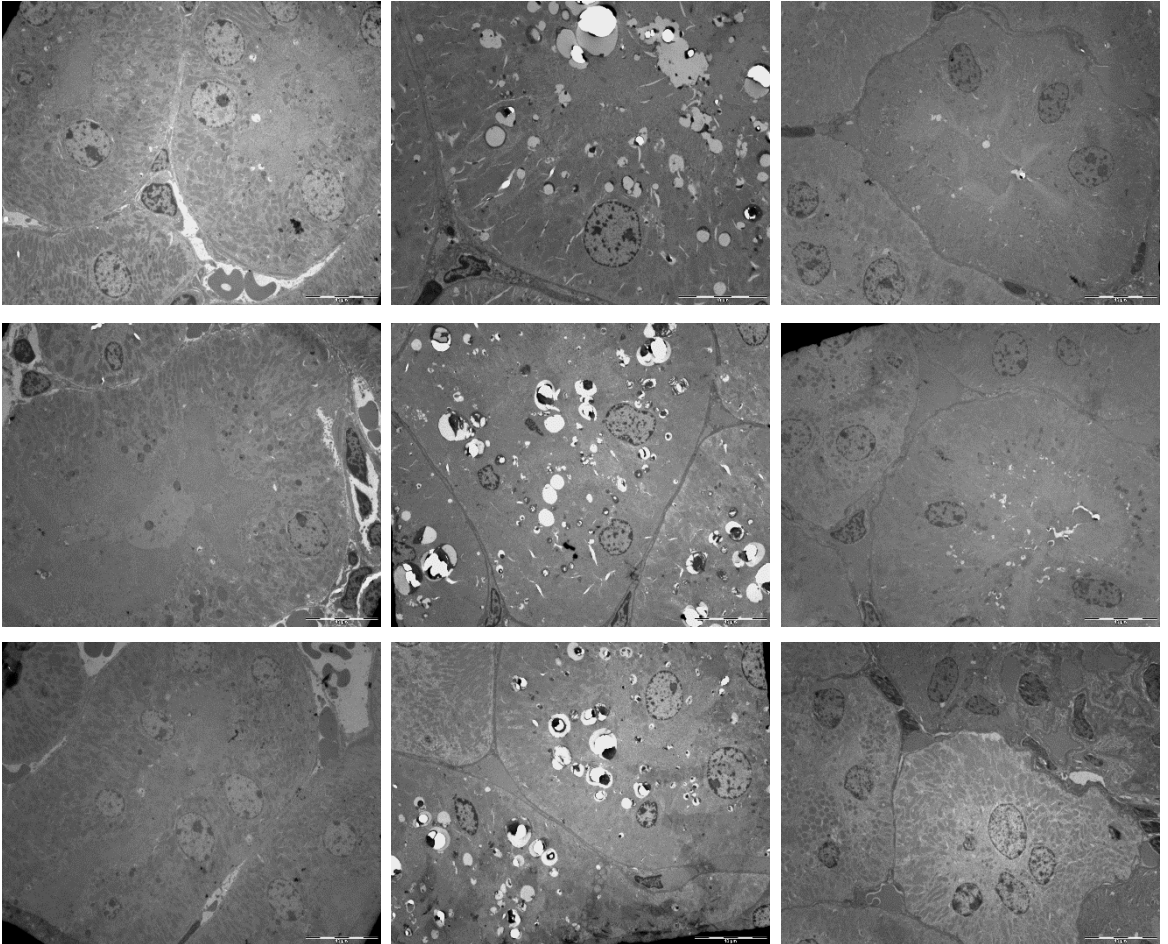

Supplement: 13630_2015_19_MOESM5_ESM.pdf [file 13630_2015_19_MOESM5_ESM.pdf]
