# Supplementary material for: Comparing the Bbs10 complete knockout phenotype with a specific renal epithelial knockout one highlights the link between renal defects and systemic inactivation in mice
Source: PubMed Central journal article supplement (PMC4535764; doi:10.1186/s13630-015-0019-8), 2015-08-13

Immunodetection of BBS10 in the *Bbs10<sup>fl/fl</sup>; Cadh16-Cre<sup>+/-</sup>* tubular region

A.

Distal tubule (BBS10, DAPI)

*Bbs10<sup>+/-</sup>; Cadh16-Cre<sup>+/-</sup>*

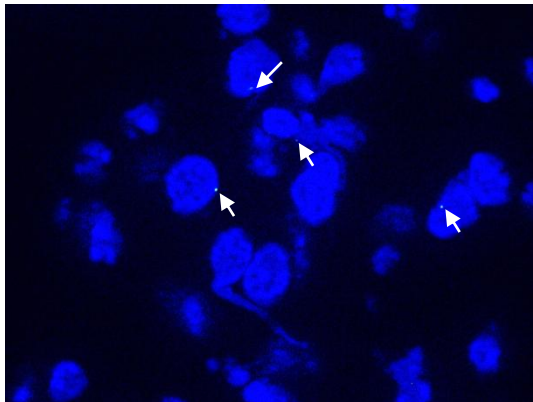

*Bbs10<sup>flox/flox</sup>; Cadh16-Cre<sup>+/-</sup>*

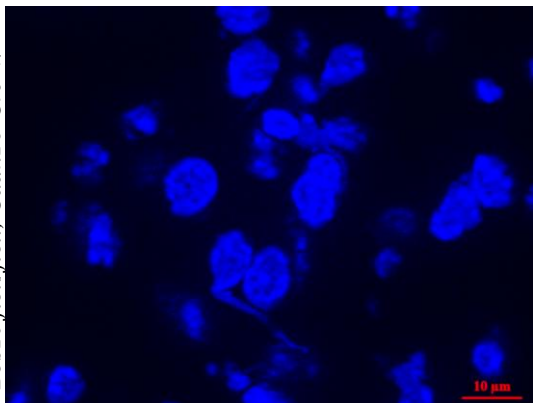

B.

3D image of distal tubule (BBS10, DAPI)

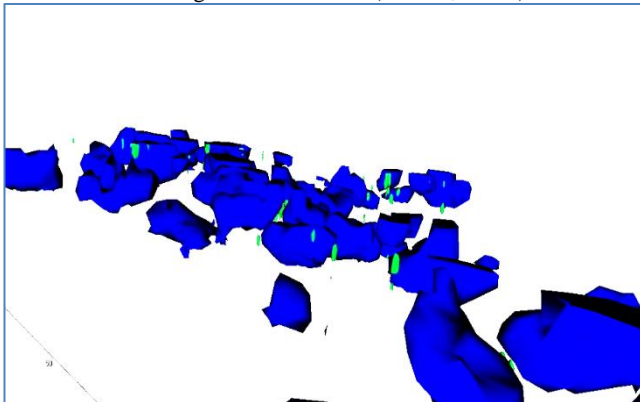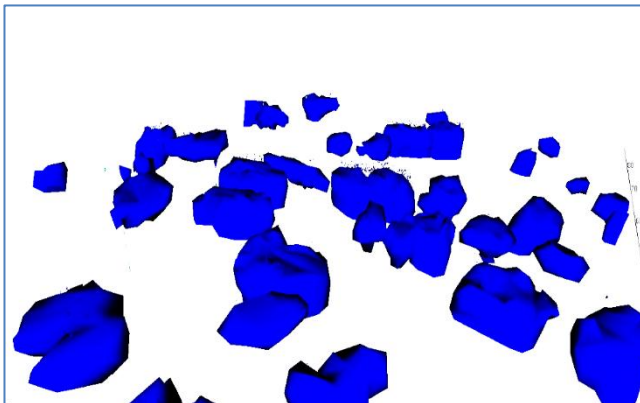

Supplement: 13630_2015_19_MOESM6_ESM.pdf [file 13630_2015_19_MOESM6_ESM.pdf]
